# Supplementary material for: Using lidar to assess the development of structural diversity in forests undergoing passive rewilding in temperate Northern Europe
Source: PeerJ journal article supplement (doi:10.7717/peerj.6219), 2019-01-14
Supplement: Fig_S2.pdf [file Fig_S2.pdf]

PeerJ

Using lidar to assess the development of structural diversity in forests undergoing passive rewilding in temperate Northern Europe

Henrik Thers, Peder Klith Bøcher, Jens-Christian Svenning

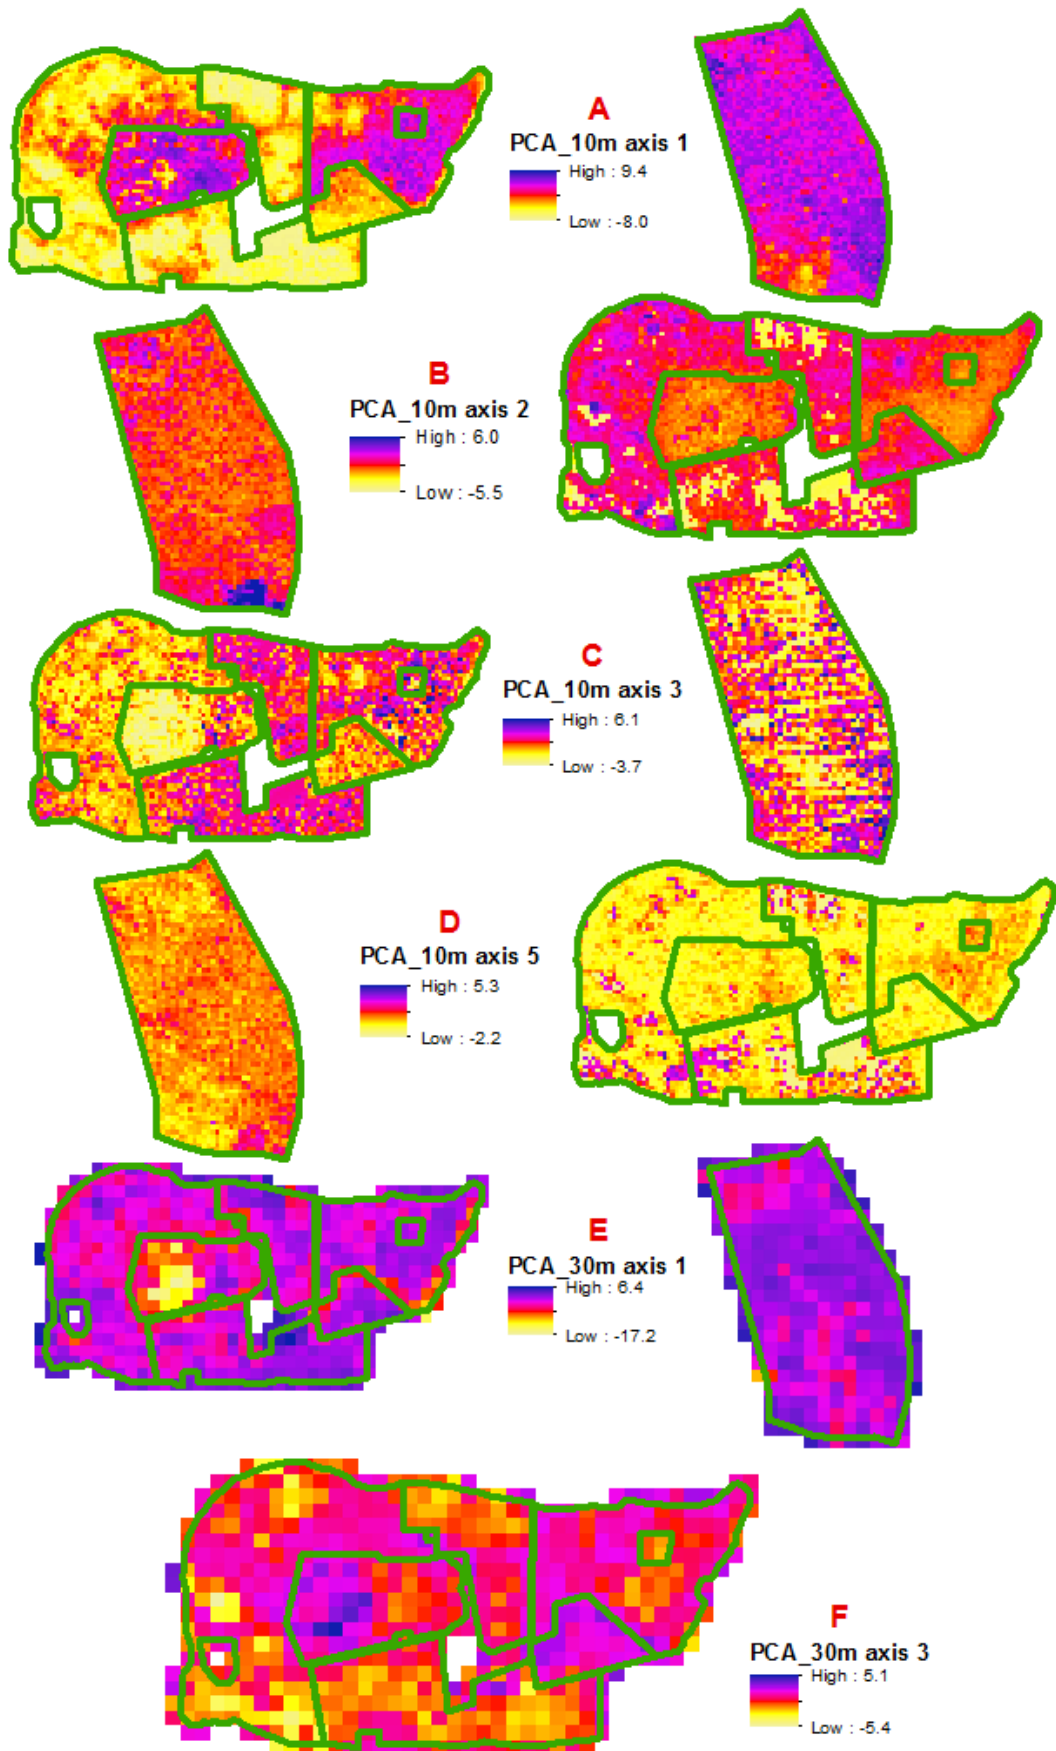

**Fig. S2. Maps of selected gradients expressed by axes of PCA\_10m and PCA\_30m.** A: Axis 1 of PCA\_10m, Vorsø to the left and Sten\_M/O to the right. B: Axis 2 of PCA\_10m, Sten\_M/O to the left and Vorsø to the right. The highest values are for cells containing blackthorn (Vorsø) and spruce (Sten\_M/O). C: Axis 3 of PCA\_10m, Vorsø to the left and Sten\_M/O to the right. Extremely low values are seen in the V\_O1 as a result of a long-term intermediate disturbance in the old oak forest. D: Axis 5 of PCA\_10m, Sten\_M/O to the left and Vorsø to the right. Common patterns are seen in the V\_Y1 and V\_Y2 despite both medians and variance being significantly different on this axis. E: Axis 1 of PCA\_30m, Vorsø to the left and Sten\_M/O to the right. The unique heterogeneity of the V\_O1 is indicated by the extremely low values. F: Axis 3 of PCA\_30m shown for Vorsø. Cells with extreme low values indicate a unique structure composed by gaps, scrub and older trees and is limited to the V\_M1. Low values in general point out transition zones between gaps and vegetation. Even though V\_M2 and Sten\_M/O are tested to have evolved different vegetation structure, these maps show that the parts of V\_M2 that had a fast colonization of *Acer platanous* are overall similar to Sten\_M/O.
