# Supplementary material for: Using lidar to assess the development of structural diversity in forests undergoing passive rewilding in temperate Northern Europe
Source: PeerJ journal article supplement (doi:10.7717/peerj.6219), 2019-01-14
Supplement: Table_S3.pdf [file Table_S3.pdf]

PeerJ

Using lidar to assess the development of structural diversity in forests undergoing passive rewilding in temperate Northern Europe

Henrik Thers, Peder Klith Bøcher, Jens-Christian Svenning

Table S3. Results from pairwise tests of medians and variance of PCA\_30m values between all forests and zones.

| area     | axis    | variance<br>( $\sigma^2$ ) | V_O1      | V_O2      | V_O3      | Sten_M/O  | V_M2      | V_M1      | V_Y1      | V_Y2      | Tran_Y3   | Fløj_Y4   |
|----------|---------|----------------------------|-----------|-----------|-----------|-----------|-----------|-----------|-----------|-----------|-----------|-----------|
| V_O1     | Dissim. |                            |           | 4         | 0         | 7         | 2         | 9         | 6         | 7         | 10        | 3         |
| V_O1     | PC1     | 21.63                      | x         | ***       | non-sign. | *** / +++ | ***       | *** / +++ | ***       | ***       | *** / +++ | ***       |
| V_O1     | PC2     | 1.55                       | x         | ***       | non-sign. | *         | non-sign. | *** / +   | ***       | ***       | *** / +++ | *         |
| V_O1     | PC3     | 1.85                       | x         | non-sign. | non-sign. | ***       | non-sign. | ***       | ***       | ***       | *** / +++ | non-sign. |
| V_O1     | PC4     | 0.41                       | x         | ***       | non-sign. | ***       | non-sign. | *** / ++  | +++       | *** / +   | *** / +++ | *         |
| V_O1     | PC5     | 2.78                       | x         | ***       | non-sign. | *** / +++ | ++        | * / +++   | *** / +++ | *** / +++ | ** / +++  | non-sign. |
| V_O2     | Dissim. |                            | 4         |           | 0         | 2         | 4         | 5         | 5         | 4         | 5         | 3         |
| V_O2     | PC1     | 8.94                       | ***       | x         | non-sign. | non-sign. | non-sign. | non-sign. | non-sign. | non-sign. | *** / +++ | **        |
| V_O2     | PC2     | 0.82                       | ***       | x         | non-sign. | ***       | ***       | ** / +    | *** / +   | * / +     | +++       | **        |
| V_O2     | PC3     | 0.58                       | non-sign. | x         | non-sign. | ***       | ***       | *** / +   | ***       | ***       | *         | non-sign. |
| V_O2     | PC4     | 0.28                       | ***       | x         | non-sign. | non-sign. | *         | non-sign. | +++       | non-sign. | non-sign. | non-sign. |
| V_O2     | PC5     | 0.55                       | ***       | x         | non-sign. | non-sign. | ***       | ***       | *         | ***       | ***       | ***       |
| V_O3     | Dissim. |                            | 0         | 0         |           | 0         | 0         | 0         | 0         | 0         | 0         | 0         |
| V_O3     | PC1     | 0.56                       | non-sign. | non-sign. | x         | non-sign. | non-sign. | non-sign. | non-sign. | non-sign. | non-sign. | non-sign. |
| V_O3     | PC2     | 0.39                       | non-sign. | non-sign. | x         | non-sign. | non-sign. | non-sign. | non-sign. | non-sign. | non-sign. | non-sign. |
| V_O3     | PC3     | 0.37                       | non-sign. | non-sign. | x         | non-sign. | non-sign. | non-sign. | non-sign. | non-sign. | non-sign. | non-sign. |
| V_O3     | PC4     | 0.32                       | non-sign. | non-sign. | x         | non-sign. | non-sign. | non-sign. | non-sign. | non-sign. | non-sign. | non-sign. |
| V_O3     | PC5     | 0.42                       | non-sign. | non-sign. | x         | non-sign. | non-sign. | non-sign. | non-sign. | non-sign. | non-sign. | non-sign. |
| Sten_M/O | Dissim. |                            | 7         | 2         | 0         |           | 7         | 10        | 8         | 8         | 10        | 4         |
| Sten_M/O | PC1     | 3.52                       | *** / +++ | non-sign. | non-sign. | x         | ***       | *** / +   | +         | ** / +    | *** / ++  | *         |
| Sten_M/O | PC2     | 1.03                       | *         | ***       | non-sign. | x         | *** / +++ | *** / +++ | *** / +++ | *** / +++ | *** / +++ | ***       |
| Sten_M/O | PC3     | 1.39                       | ***       | ***       | non-sign. | x         | ***       | *** / +++ | ***       | ***       | *** / +++ | ***       |
| Sten_M/O | PC4     | 0.44                       | ***       | non-sign. | non-sign. | x         | *** / +   | *** / +++ | ** / +++  | +++       | ** / ++   | non-sign. |
| Sten_M/O | PC5     | 0.80                       | *** / +++ | non-sign. | non-sign. | x         | ***       | *** / +   | *** / ++  | *** / ++  | *** / +++ | ***       |
| V_M2     | Dissim. |                            | 2         | 4         | 0         | 7         |           | 4         | 4         | 4         | 9         | 1         |
| V_M2     | PC1     | 8.65                       | ***       | non-sign. | non-sign. | ***       | x         | non-sign. | non-sign. | non-sign. | *** / +++ | ***       |
| V_M2     | PC2     | 3.93                       | non-sign. | ***       | non-sign. | *** / +++ | x         | ***       | ***       | ***       | *** / +++ | non-sign. |
| V_M2     | PC3     | 1.07                       | non-sign. | ***       | non-sign. | ***       | x         | *** / ++  | ***       | *         | *** / +++ | non-sign. |
| V_M2     | PC4     | 0.98                       | non-sign. | *         | non-sign. | *** / +   | x         | ***       | ++        | *         | *** / +++ | non-sign. |
| V_M2     | PC5     | 0.91                       | ++        | ***       | non-sign. | ***       | x         | non-sign. | ***       | *         | +         | non-sign. |
| V_M1     | Dissim. |                            | 9         | 5         | 0         | 10        | 4         |           | 4         | 0         | 8         | 5         |
| V_M1     | PC1     | 6.09                       | *** / +++ | non-sign. | non-sign. | *** / +   | non-sign. | x         | *         | non-sign. | *** / +++ | *** / +   |
| V_M1     | PC2     | 3.57                       | *** / +   | ** / +    | non-sign. | *** / +++ | ***       | x         | non-sign. | non-sign. | *** / +++ | *** / ++  |
| V_M1     | PC3     | 2.58                       | ***       | *** / +   | non-sign. | *** / +++ | *** / ++  | x         | non-sign. | non-sign. | *** / +++ | ***       |
| V_M1     | PC4     | 1.68                       | *** / ++  | non-sign. | non-sign. | *** / +++ | ***       | x         | *** / +   | non-sign. | +++       | non-sign. |
| V_M1     | PC5     | 1.68                       | * / +++   | ***       | non-sign. | *** / +   | non-sign. | x         | **        | non-sign. | +         | non-sign. |
| V_Y1     | Dissim. |                            | 6         | 5         | 0         | 8         | 4         | 4         |           | 0         | 8         | 6         |
| V_Y1     | PC1     | 7.55                       | ***       | non-sign. | non-sign. | +         | non-sign. | *         | x         | non-sign. | *** / +++ | *         |
| V_Y1     | PC2     | 3.15                       | ***       | *** / +   | non-sign. | *** / +++ | ***       | non-sign. | x         | non-sign. | *** / +++ | *** / +   |
| V_Y1     | PC3     | 1.56                       | ***       | ***       | non-sign. | ***       | ***       | non-sign. | x         | non-sign. | *** / +++ | ***       |
| V_Y1     | PC4     | 2.38                       | +++       | +++       | non-sign. | ** / +++  | ++        | *** / +   | x         | non-sign. | ** / +++  | +++       |
| V_Y1     | PC5     | 0.28                       | *** / +++ | *         | non-sign. | *** / ++  | ***       | **        | x         | non-sign. | non-sign. | *         |

Table S3 continued

| area    | axis    | variance<br>( $\sigma^2$ ) | V_O1      | V_O2      | V_O3      | Sten_M/O  | V_M2      | V_M1      | V_Y1      | V_Y2      | Tran_Y3   | Fløj_Y4   |
|---------|---------|----------------------------|-----------|-----------|-----------|-----------|-----------|-----------|-----------|-----------|-----------|-----------|
| V_Y2    | Dissim. |                            | 7         | 4         | 0         | 8         | 4         | 0         | 0         |           | 7         | 5         |
| V_Y2    | PC1     | 6.88                       | ***       | non-sign. | non-sign. | ** / +    | non-sign. | non-sign. | non-sign. | x         | *** / +++ | *** / +   |
| V_Y2    | PC2     | 2.88                       | ***       | * / +     | non-sign. | *** / +++ | ***       | non-sign. | non-sign. | x         | *** / +++ | *** / ++  |
| V_Y2    | PC3     | 1.56                       | ***       | ***       | non-sign. | ***       | *         | non-sign. | non-sign. | x         | *** / +++ | **        |
| V_Y2    | PC4     | 2.49                       | *** / +   | non-sign. | non-sign. | +++       | *         | non-sign. | non-sign. | x         | +++       | non-sign. |
| V_Y2    | PC5     | 0.20                       | *** / +++ | ***       | non-sign. | *** / ++  | *         | non-sign. | non-sign. | x         | non-sign. | non-sign. |
| Tran_Y3 | Dissim. |                            | 10        | 5         | 0         | 10        | 9         | 8         | 8         | 7         |           | 3         |
| Tran_Y3 | PC1     | 1.00                       | *** / +++ | *** / +++ | non-sign. | *** / ++  | *** / +++ | *** / +++ | *** / +++ | *** / +++ | x         | ***       |
| Tran_Y3 | PC2     | 0.07                       | *** / +++ | +++       | non-sign. | *** / +++ | *** / +++ | *** / +++ | *** / +++ | *** / +++ | x         | ***       |
| Tran_Y3 | PC3     | 0.29                       | *** / +++ | *         | non-sign. | *** / +++ | *** / +++ | *** / +++ | *** / +++ | *** / +++ | x         | *         |
| Tran_Y3 | PC4     | 0.09                       | *** / +++ | non-sign. | non-sign. | ** / ++   | *** / +++ | +++       | ** / +++  | +++       | x         | non-sign. |
| Tran_Y3 | PC5     | 0.19                       | ** / +++  | ***       | non-sign. | *** / +++ | +         | +         | non-sign. | non-sign. | x         | non-sign. |
| Fløj_Y4 | Dissim. |                            | 3         | 3         | 0         | 4         | 1         | 5         | 6         | 5         | 3         |           |
| Fløj_Y4 | PC1     | 0.65                       | ***       | **        | non-sign. | *         | ***       | *** / +   | *         | *** / +   | ***       | x         |
| Fløj_Y4 | PC2     | 0.23                       | *         | **        | non-sign. | ***       | non-sign. | *** / ++  | *** / +   | *** / ++  | ***       | x         |
| Fløj_Y4 | PC3     | 0.74                       | non-sign. | non-sign. | non-sign. | ***       | non-sign. | ***       | ***       | **        | *         | x         |
| Fløj_Y4 | PC4     | 0.16                       | *         | non-sign. | non-sign. | non-sign. | non-sign. | non-sign. | +++       | non-sign. | non-sign. | x         |
| Fløj_Y4 | PC5     | 0.35                       | non-sign. | ***       | non-sign. | ***       | non-sign. | non-sign. | *         | non-sign. | non-sign. | x         |

All managed forests and zones of Vorsø were tested pairwise according to medians and variance of the first five axes of the PCA\_30m (PCA of all 30-meter cells in the seven Vorsø zones and the three managed forests). We used Kruskal-Wallis to test for different medians and Levene's test to test for different variances. Asterisks indicate significance for medians and plusses indicate significance for variance. *Non-sig.* indicates non-significance of both medians and variance. Significance levels have been Bonferroni corrected by dividing 0.05 with 225. The corrected level of significance used here was 0.000222. \*/+ = below 0.000222, \*\*/++ = below 0.00001, \*\*\*/+++ = below 0.000001. The column of variance ( $\sigma^2$ ) lists variance values. The rows marked *dissim.* list how many of the 10 pairwise tests are significant as a measure of dissimilarity between two areas.
